# Supplementary material for: The anchoring of a Cu(ii)–salophen complex on magnetic mesoporous cellulose nanofibers: green synthesis and an investigation of its catalytic role in tetrazole reactions through a facile one-pot route
Source: Royal Society of Chemistry journal article supplement (doi:10.1039/d1ra01913a), 2021-01-01

**Anchoring of Cu (II)-salophen complex on magnetic mesoporous cellulose nanofibers: green synthesis and investigation of its catalytic role for the tetrazole reactions through a facile one-pot deposition route**

Pouya Ghamari kargar, Ghodsieh Bagherzade\*

**5-phenyl-1H-tetrazole (4a):**

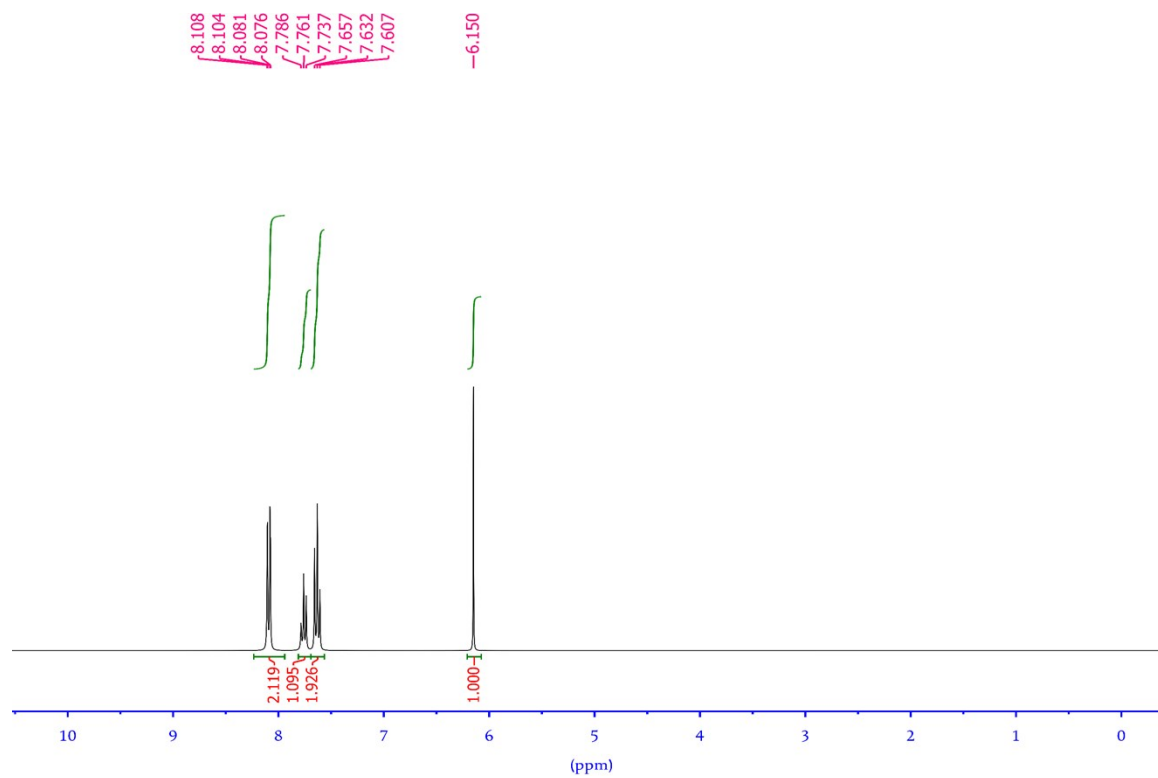

**5-(4-chlorophenyl)-1H-tetrazole (4b):**

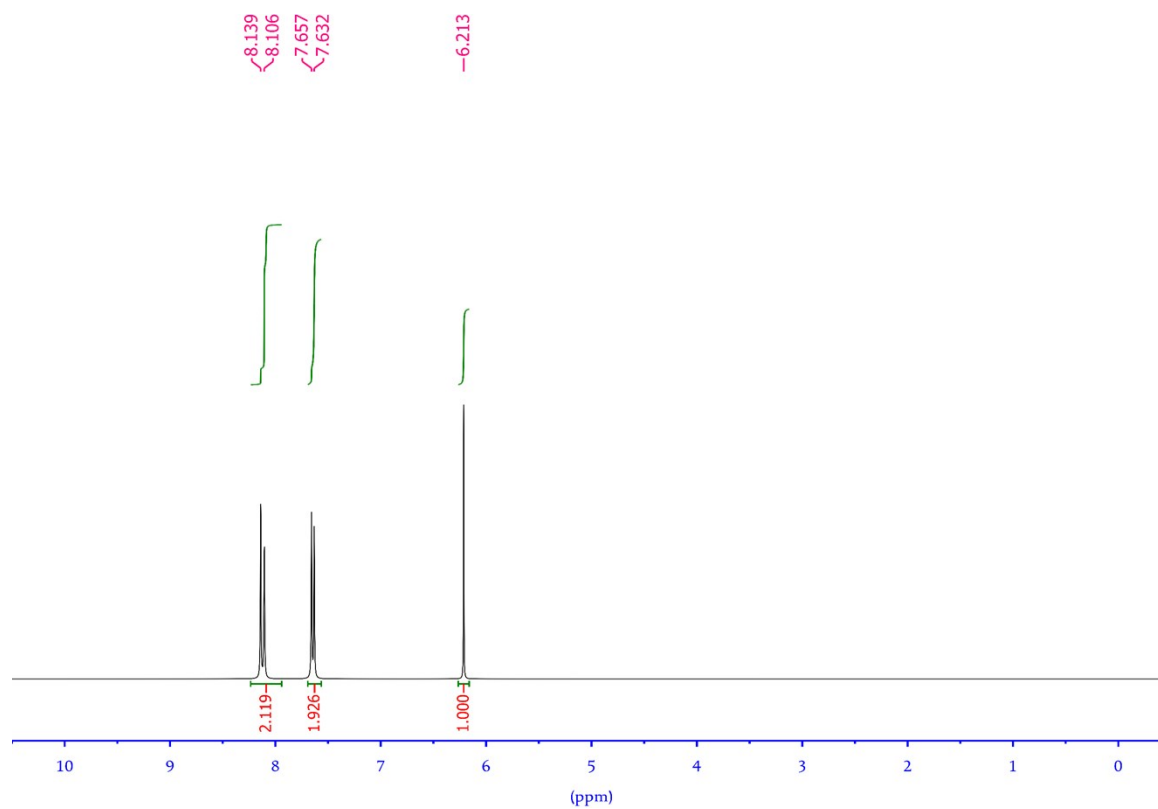

**5-(4-nitrophenyl)-1H-tetrazole (4c):**

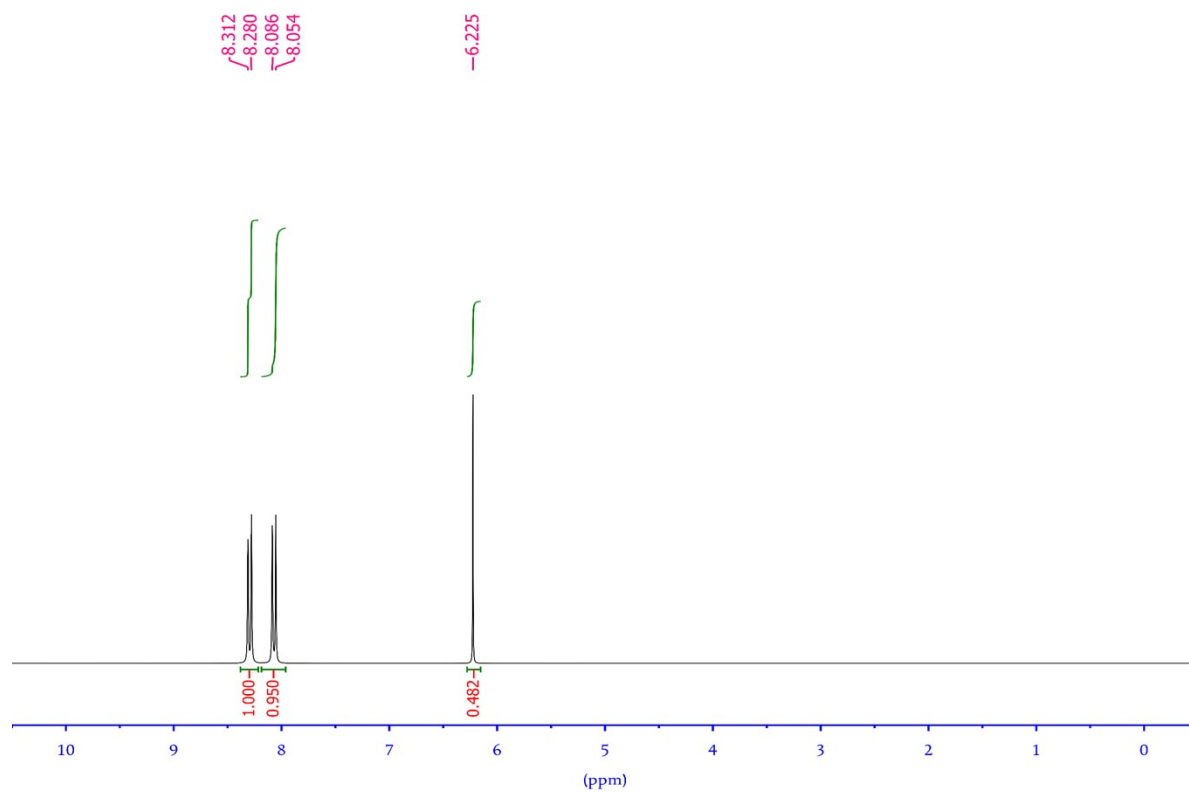

**4-(1H-tetrazol-5-yl)phenol (4d):**

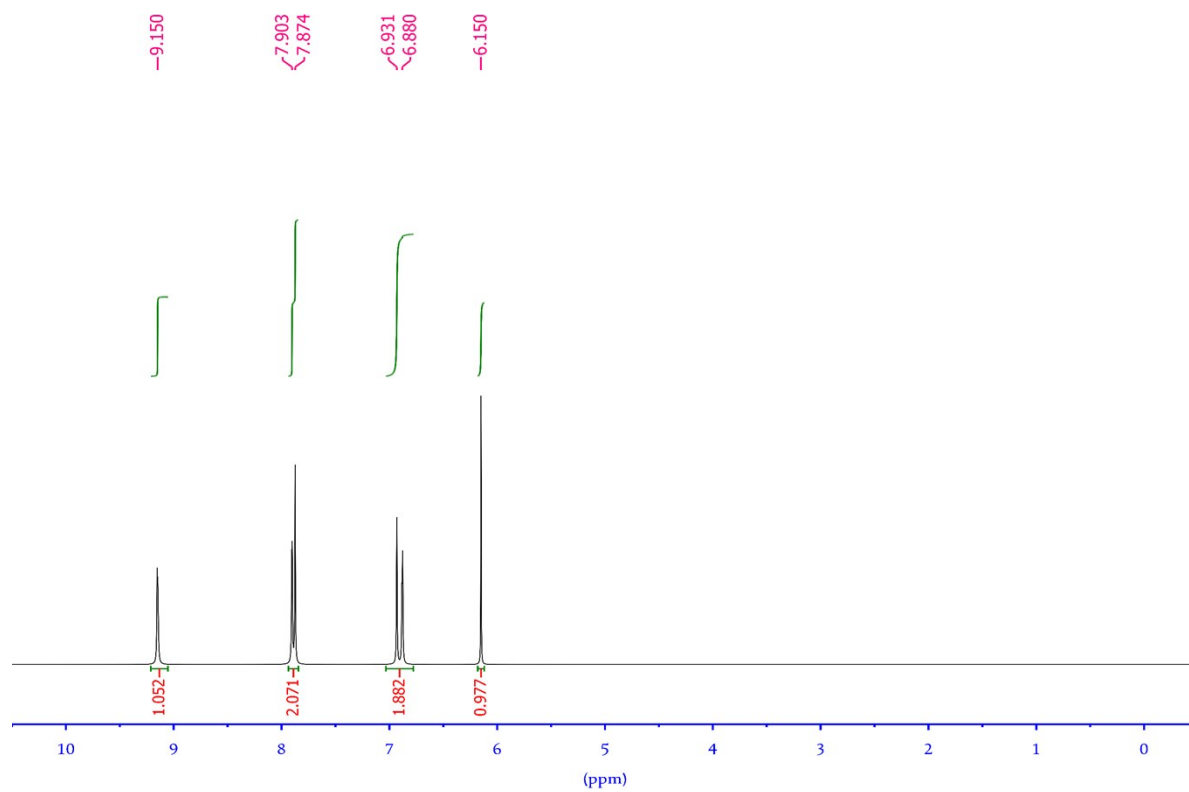

**5-(4-methoxyphenyl)-1H-tetrazole (4e):**

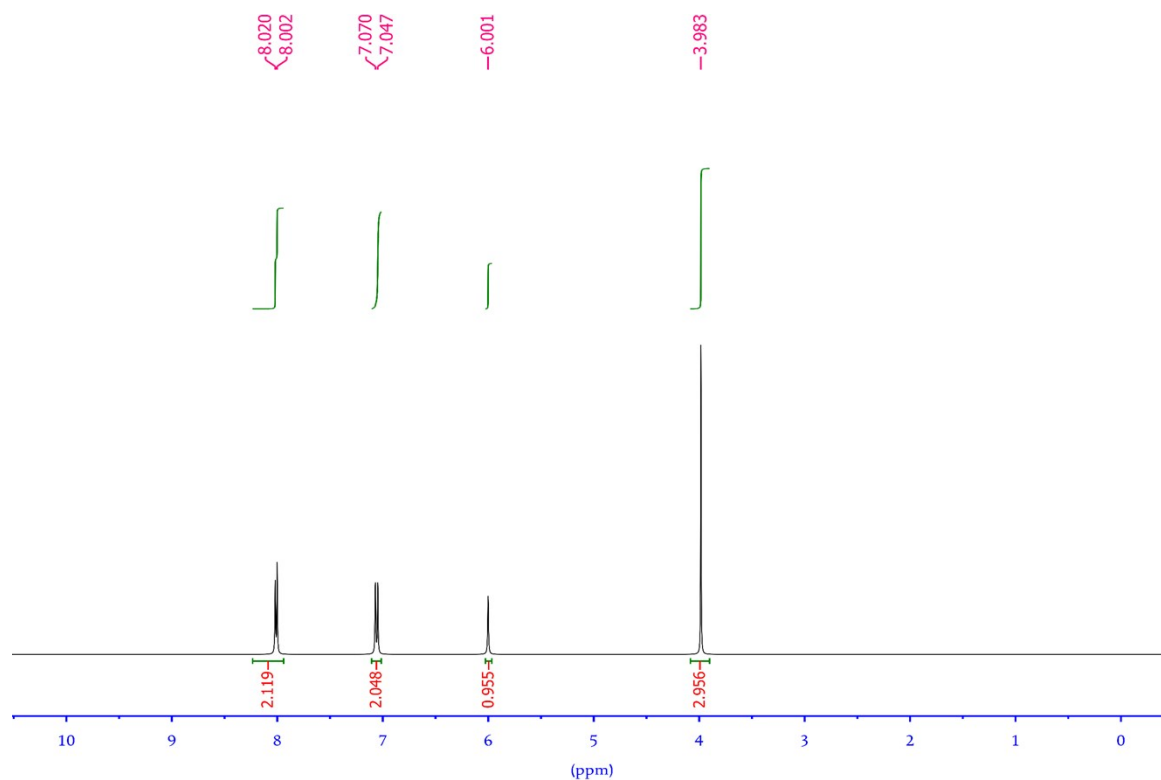

**5-(2-methoxyphenyl)-1H-tetrazole (4f):**

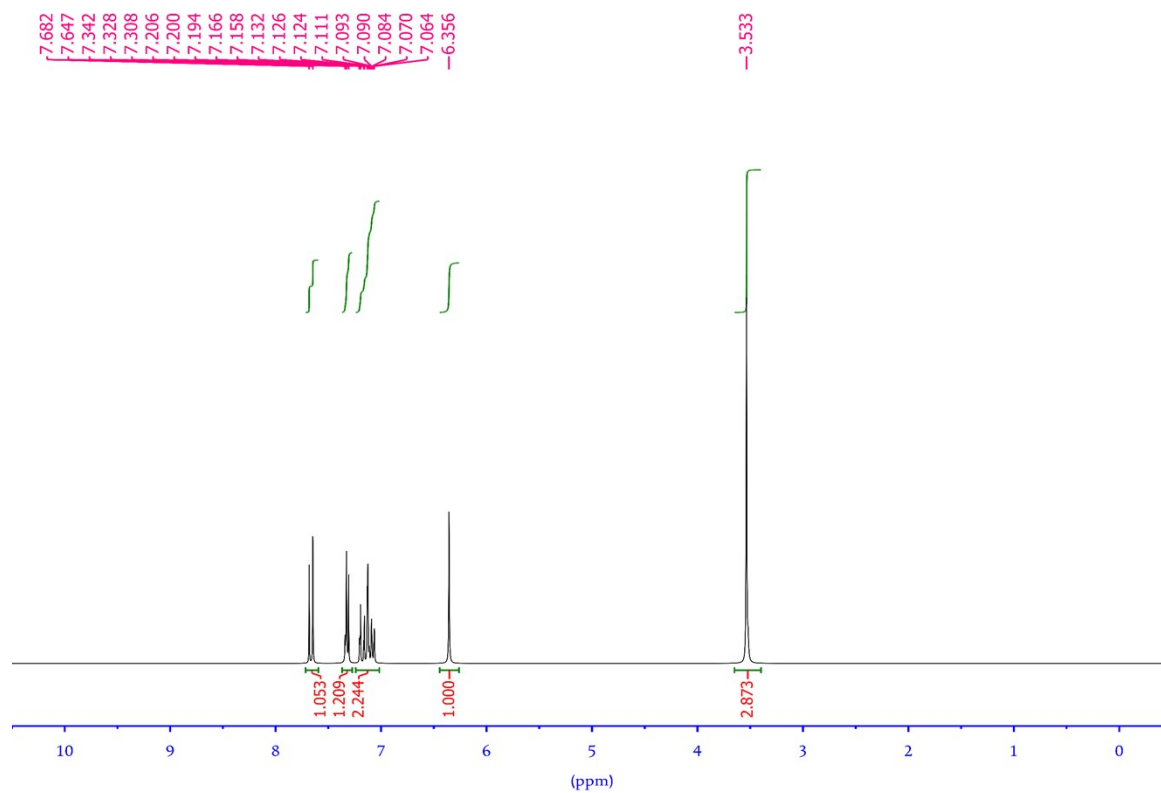

**2-(1H-tetrazol-5-yl) phenol (4g):**

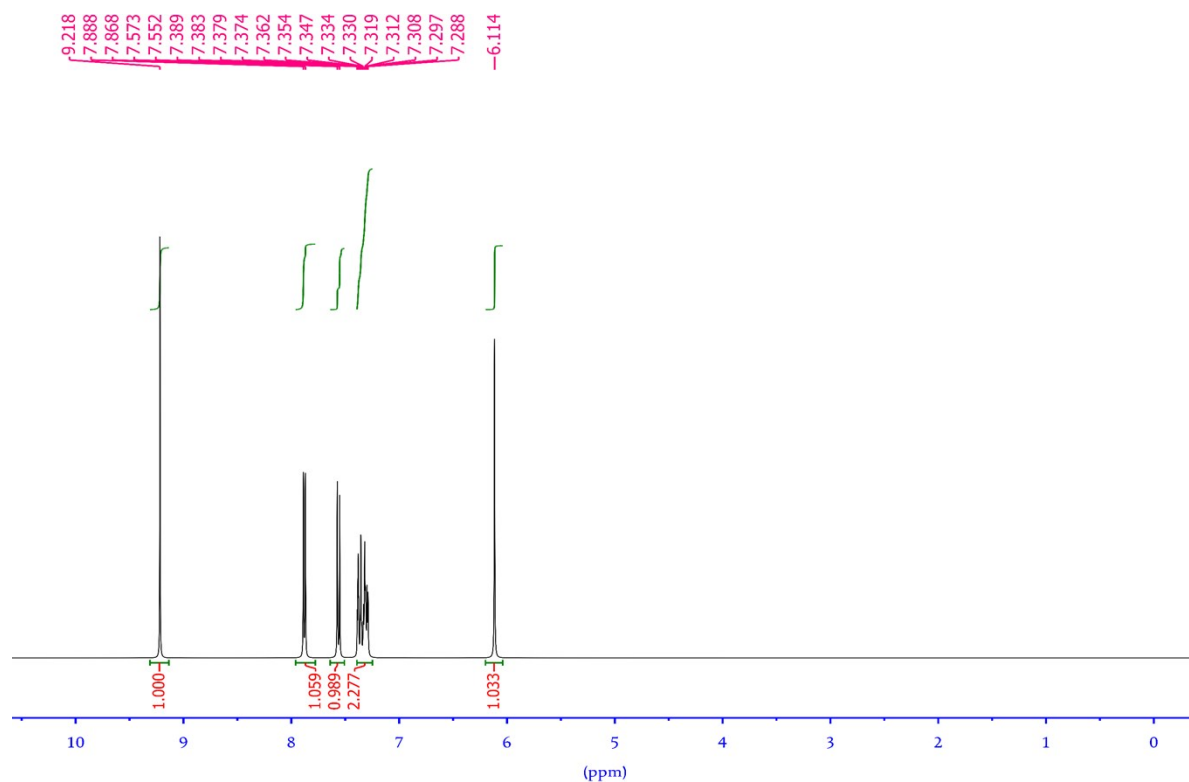

**N,N-dimethyl-4-(1H-tetrazol-5-yl)aniline (4h):**

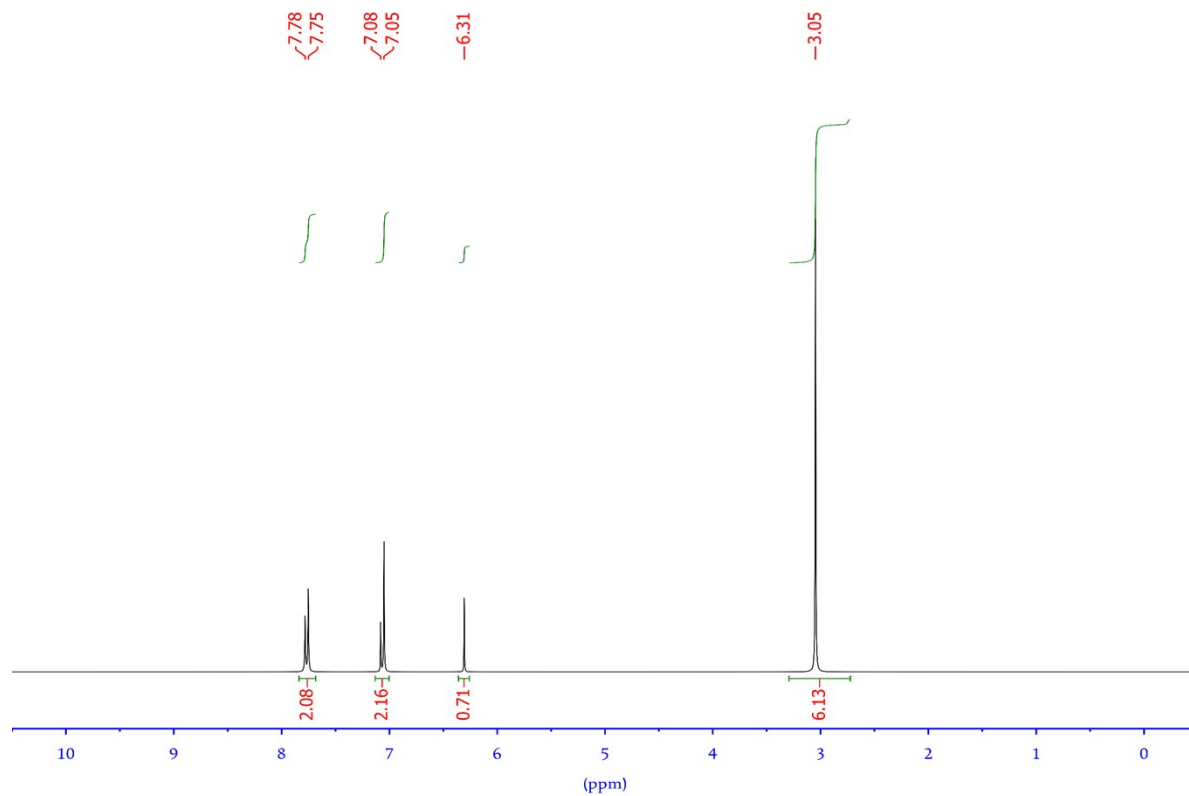

**4-(1H-tetrazol-5-yl)benzaldehyde (4i):**

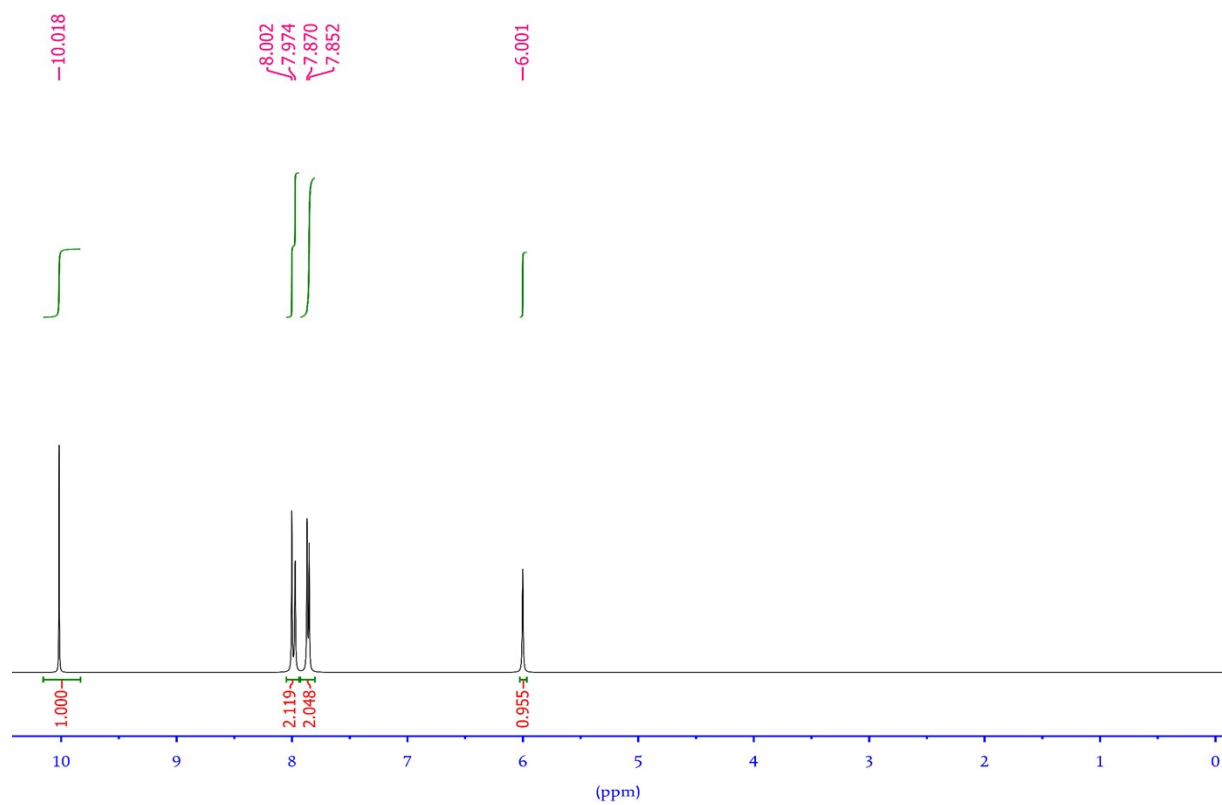

**4-(1H-tetrazol-5-yl)benzene-1,2-diol (4j):**

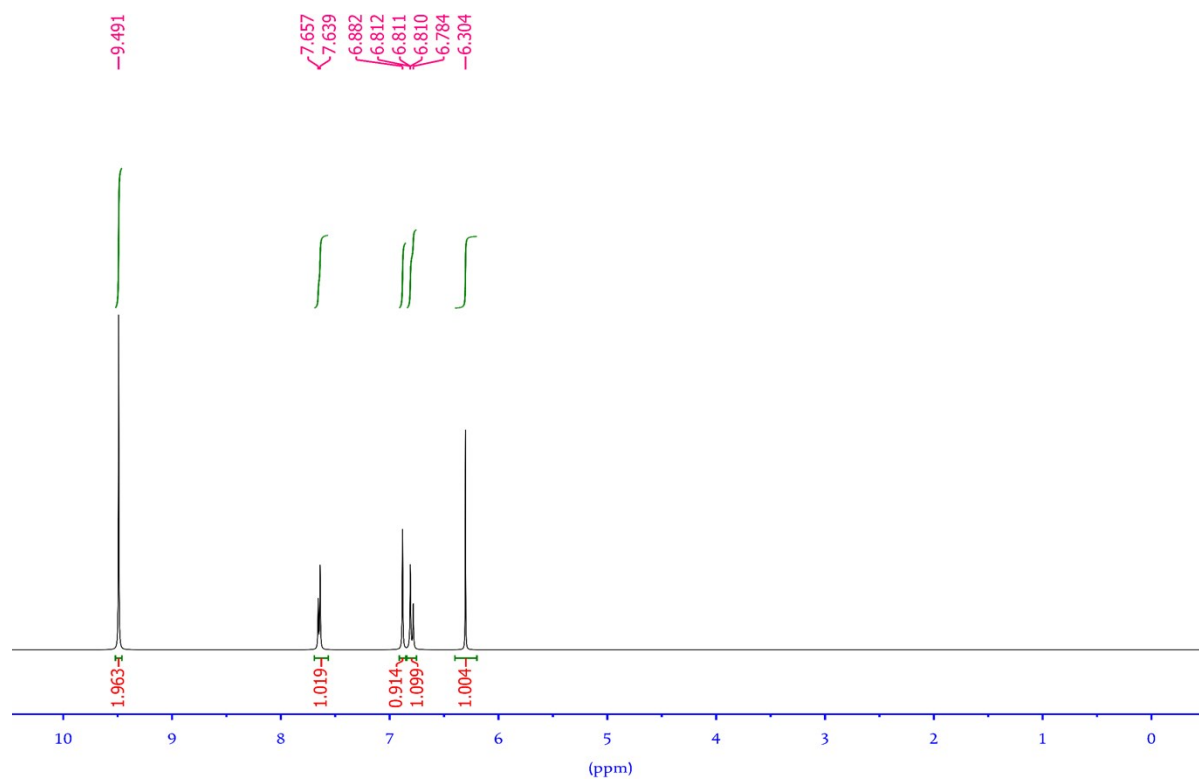

**1-phenyl-1H-tetrazole (7a):**

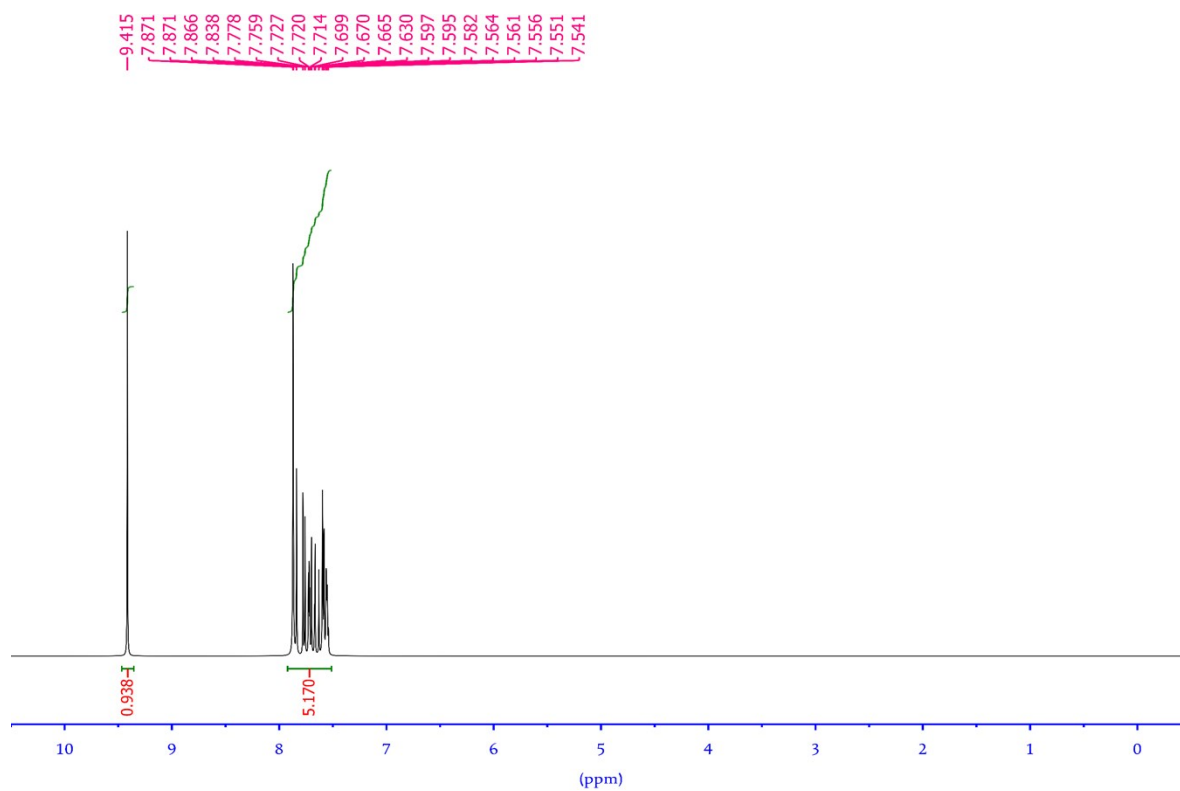

**1-(4-chlorophenyl)-1H-tetrazole (7b):**

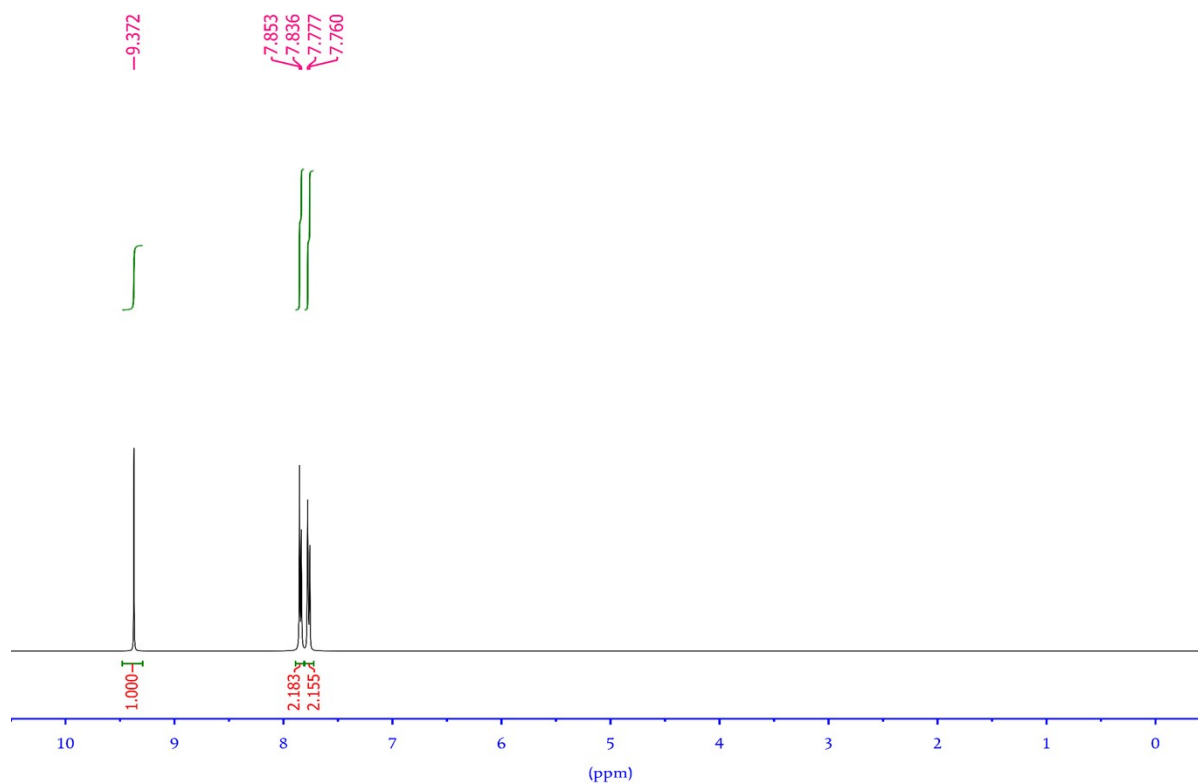

**1-(4-bromophenyl)-1H-tetrazole (7c):**

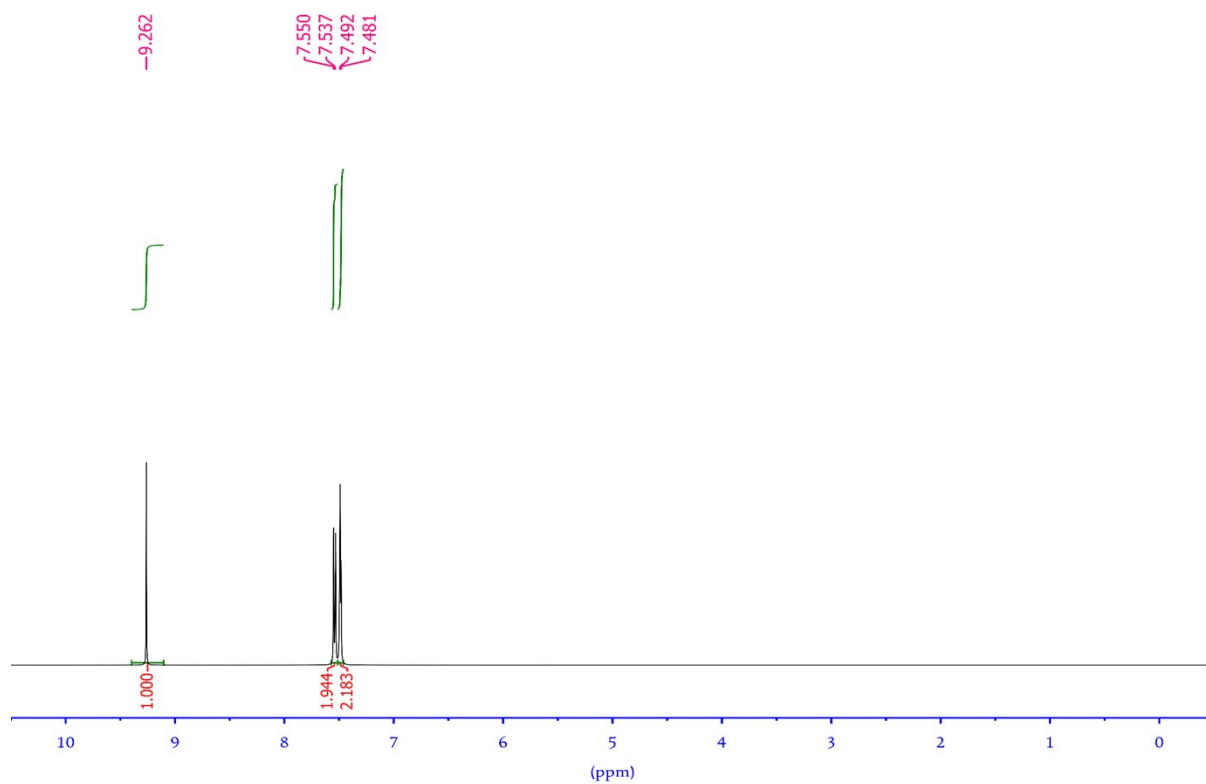

**1-(p-tolyl)-1H-tetrazole (7d):**

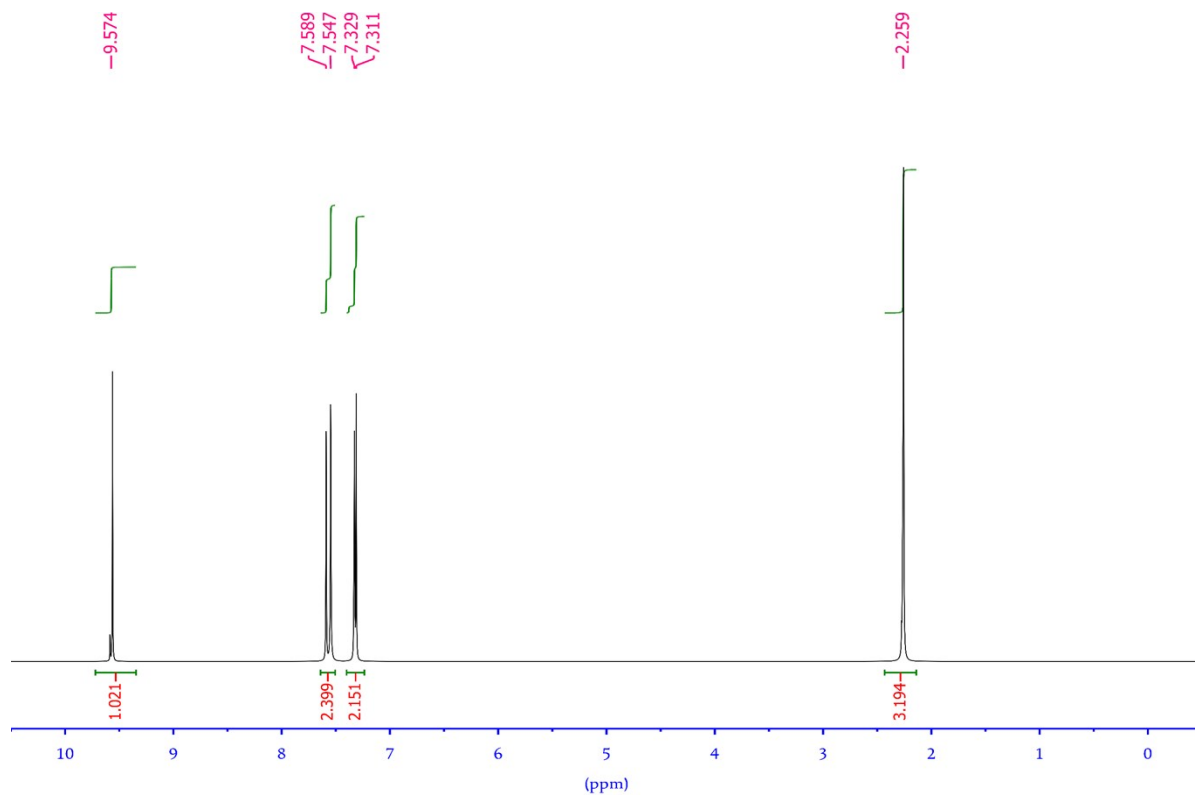



**1-(4-methoxyphenyl)-1H-tetrazole (7e):**

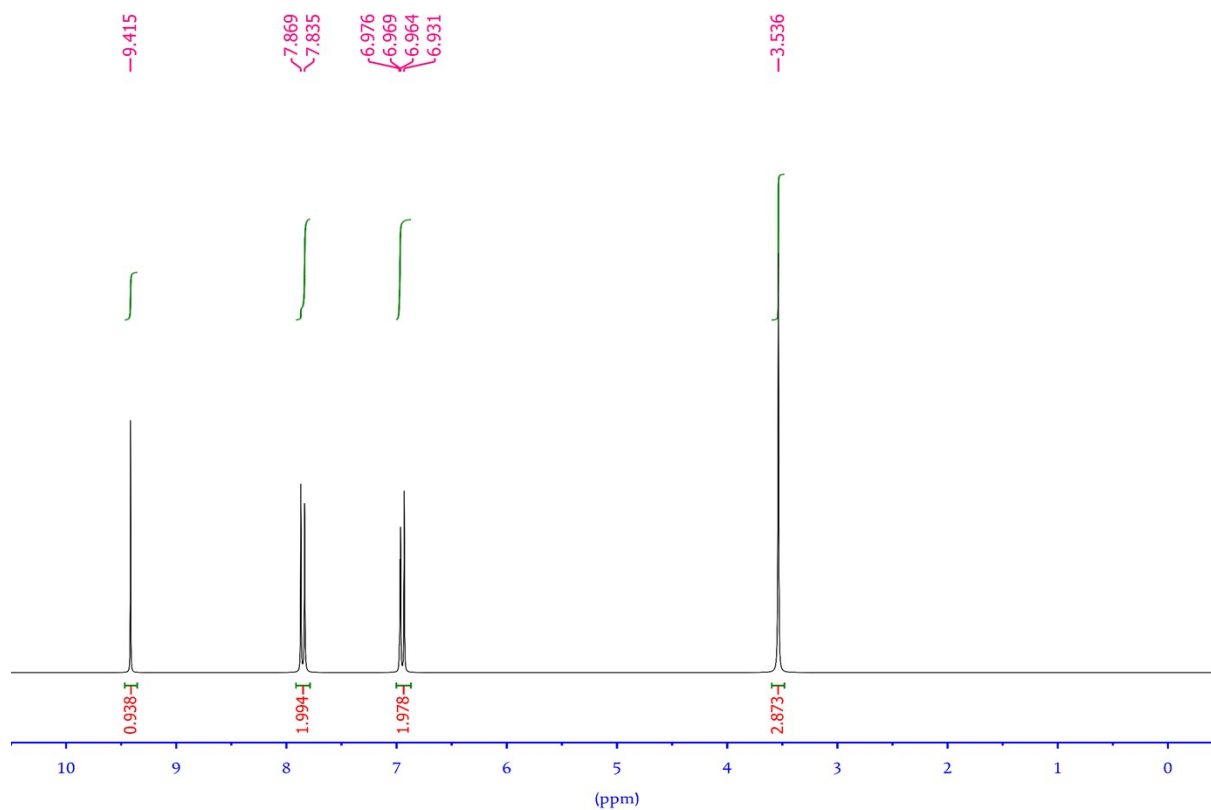

**1-(4-nitrophenyl)-1H-tetrazole (7f):**

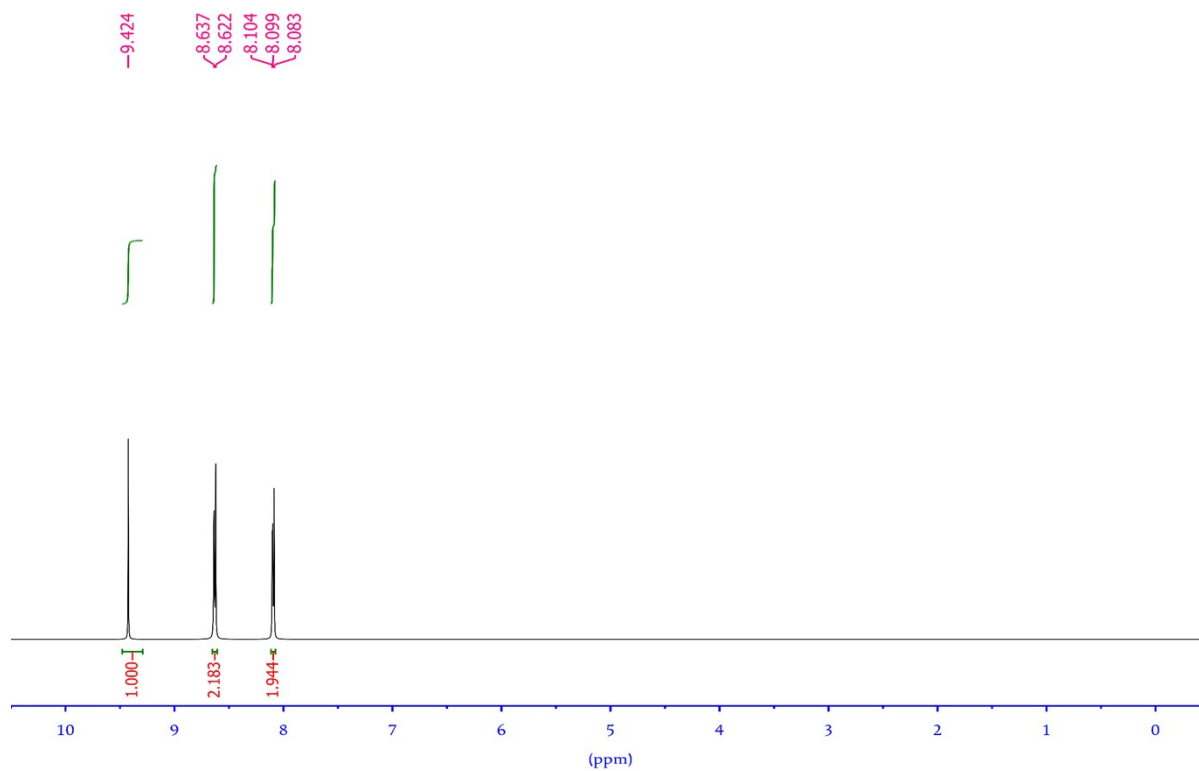

### 1-(3-chlorophenyl)-1H-tetrazole (7g):

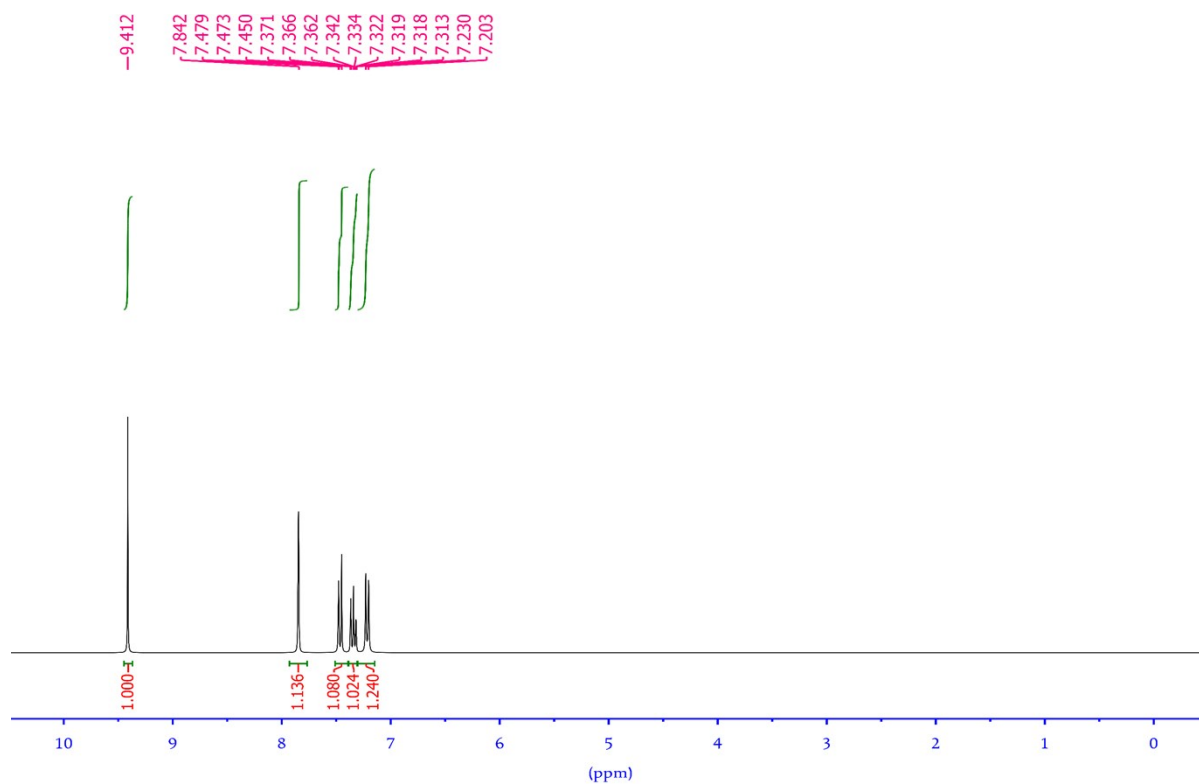

### 1-(3-bromophenyl)-1H-tetrazole (7h):

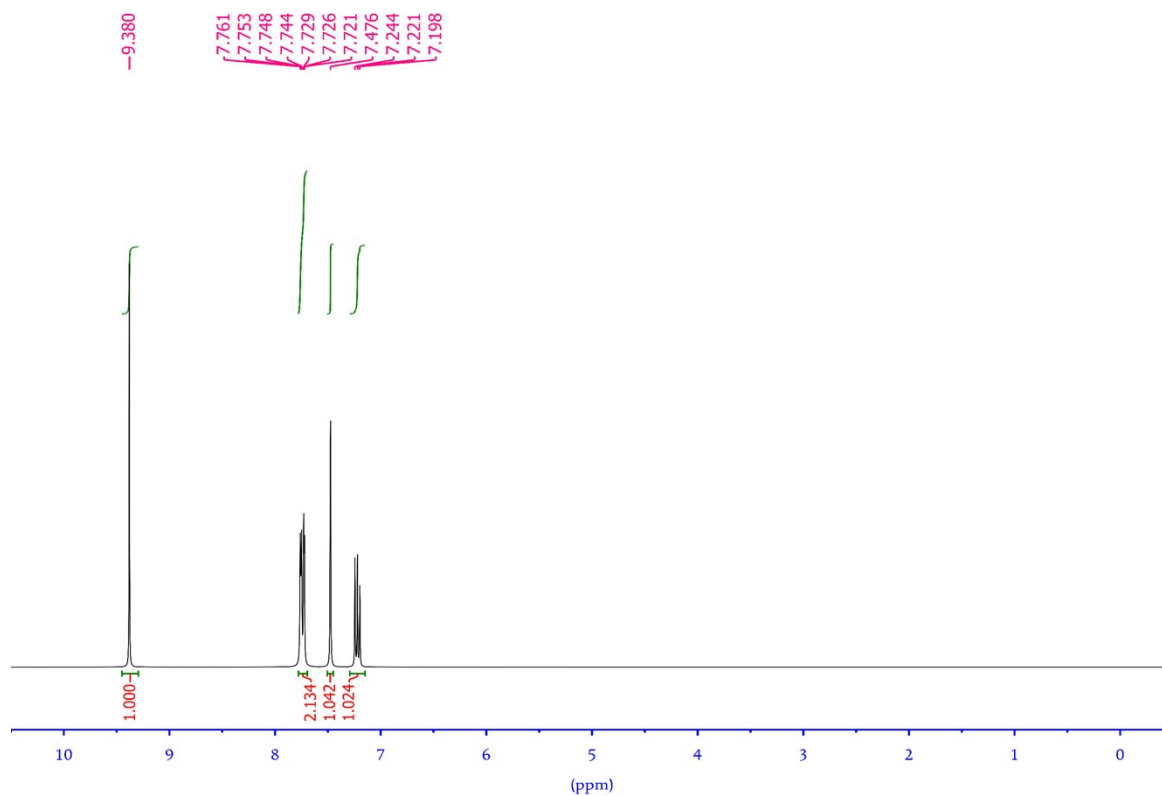

**1-(m-tolyl)-1H-tetrazole (7i):**

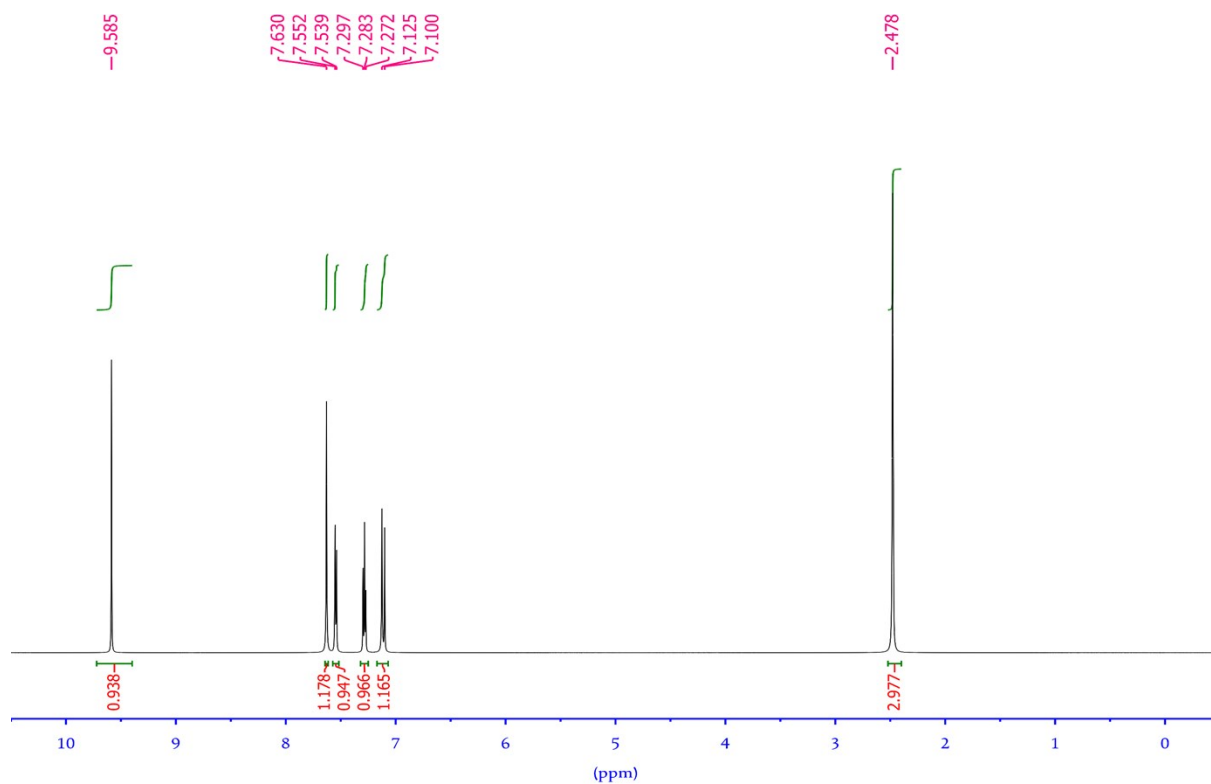

**1-(3-methoxyphenyl)-1H-tetrazole (7j):**

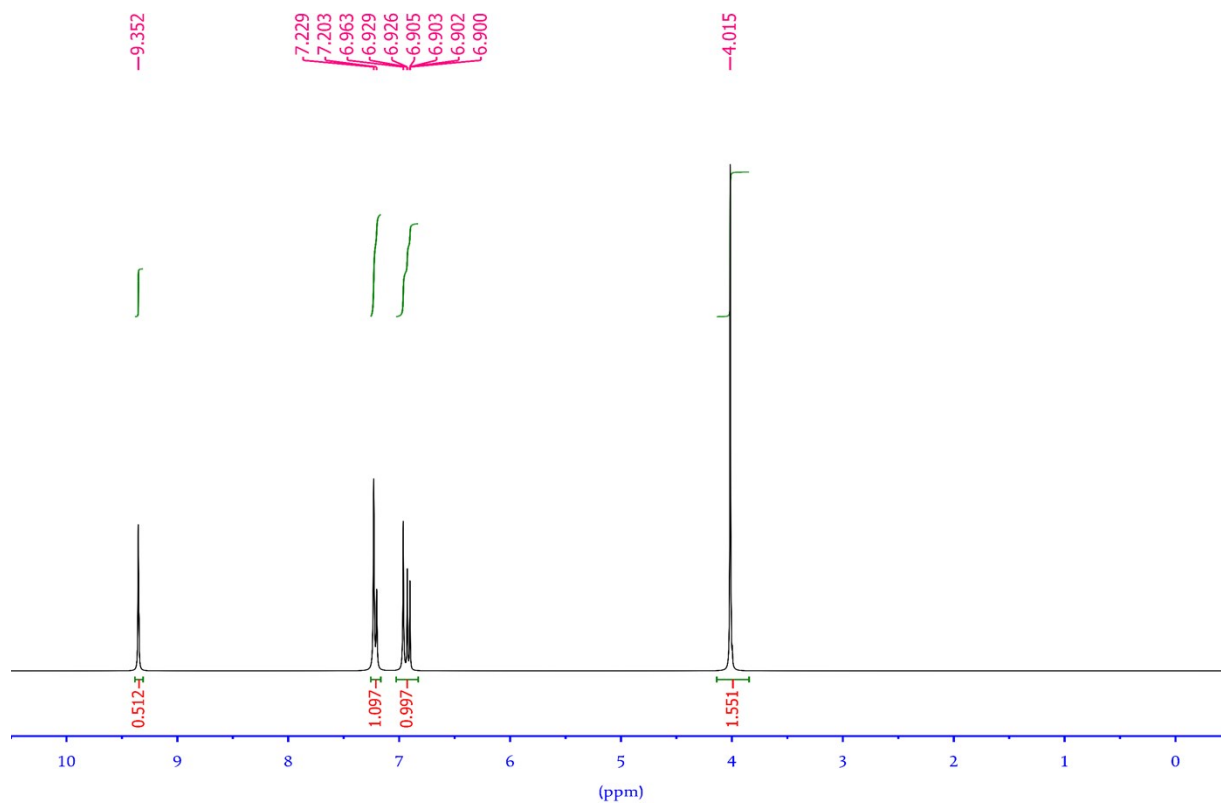

Supplement: d1ra01913a1.pdf [file d1ra01913a1.pdf]
